# Supplementary material for: Determination of sitagliptin in human plasma using a smart electrochemical sensor based on electroactive molecularly imprinted nanoparticles
Source: Royal Society of Chemistry journal article supplement (doi:10.1039/d1na00194a), 2021-01-01
Supplement: d1na00194a1.pdf [file d1na00194a1.pdf]

## **Supplementary Information**

### **Determination of sitagliptin in human plasma using a smart electrochemical sensor based on electroactive molecularly imprinted nanoparticles**

Isma Haq,<sup>a</sup> Kaseb Alanazi,<sup>b</sup> Joanna Czulak,<sup>c</sup> Sabrina Di Masi,<sup>d</sup> Elena Piletska,<sup>b</sup> Adnan Mujahid,<sup>a</sup> Tajamal Hussain,<sup>a</sup> Sergey A. Piletsky,<sup>b</sup> Alvaro Garcia-Cruz<sup>b\*</sup>

<sup>a</sup> Institute of Chemistry, University of the Punjab, Quaid-e-Azam Campus, Lahore, Pakistan.

<sup>b</sup> Department of Chemistry, University of Leicester, University Rd, LE1 7RH, Leicester (UK).

<sup>c</sup> MIP Diagnostics Ltd., Colworth Science Park, Sharnbrook, MK44 1LQ, Bedford, UK

<sup>d</sup> University of Salento, Department of Biological and Environmental Sciences and Technologies, Via Monteroni, Lecce, IT 73100, Italy.

#### **1. Dansyl Chloride (DNSCL) Test**

Silanisation of glass beads was confirmed by dansyl chloride test. To perform this test 10 mg of DNSCL was dissolve in 1 mL of ethanol and 0.5 g of silanized glass beads was immersed in this solution for 1 hour in dark. Similarly 0.5 g of non-silanized glass beads was immersed in DNSCL solution for 1 hour in dark. After 1 hour washed these glass beads with ethanol/acetone to remove dansyl chloride and checked its fluorescence under UV lamp. Non-silanised glass beads were non-fluorescent while silanized glass beads were fluorescent in UV lamp, which confirmed the successive silanization of glass beads as shown in the Figure S2.

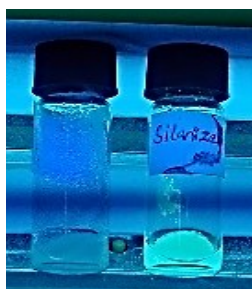

**Figure S1.** The presence of amino groups on the solid phase was confirmed using the DNSCL test.

## 2. Materials and Methods

**Table S1.** Different composition of polymerization mixture.

| Monomer   | Function                                  | nanoMIP-1           | nanoMIP-2            |
|-----------|-------------------------------------------|---------------------|----------------------|
| Iniferter | Initiator, transfer agent, and terminator | 0.75 g (3.14 mmol)  | 0.75 g (3.14 mmol)   |
| PETMP     | Chain transfer agent                      | 0.18 g (0.37 mmol)  | 0.18 g (0.37 mmol)   |
| FcMMA     | Electroactive monomer, redox label        | 0.17 g (27.1 mmol)  | 0.17 g (27.1 mmol)   |
| NIPAM     | Thermo-responsive properties              | 0.02 g (0.17 mmol)  | 0.02 g (0.17 mmol)   |
| EGMP      | Functional monomer                        | 7.03 g (33.47 mmol) | 7.03 g (33.47 mmol)  |
| TFMAA     | Functional monomer                        | -                   | 4.122 g (29.43 mmol) |
| MAA       | Functional monomer                        | 1.44 g (16.35 mmol) | -                    |
| NAPMA     | Functional monomer                        | 0.02 g (0.17 mmol)  | 0.01 g (0.085 mmol)  |
| MBA       | Cross-linker/<br>Functional monomer       | 2.52 g (16.35 mmol) | 2.52 g (16.35 mmol)  |
| EGDMA     | Cross-linker                              | 3.24 g (16.35 mmol) | 3.24 g (16.35 mmol)  |
| TRIM      | Cross-linker                              | 3.24 g (9.57 mmol)  | 3.24 g (9.57 mmol)   |

### 3. Result and Discussion

**Table S2.** Binding energy for Sitagliptin with the monomer database

| Monomers     | Binding Score, kJmol <sup>-1</sup> |
|--------------|------------------------------------|
| <i>TFMAA</i> | -37.60                             |
| MBA          | -31.84                             |
| EGMP         | -29.32                             |
| <i>MAA</i>   | -28.18                             |
| NAPMA        | -26.73                             |

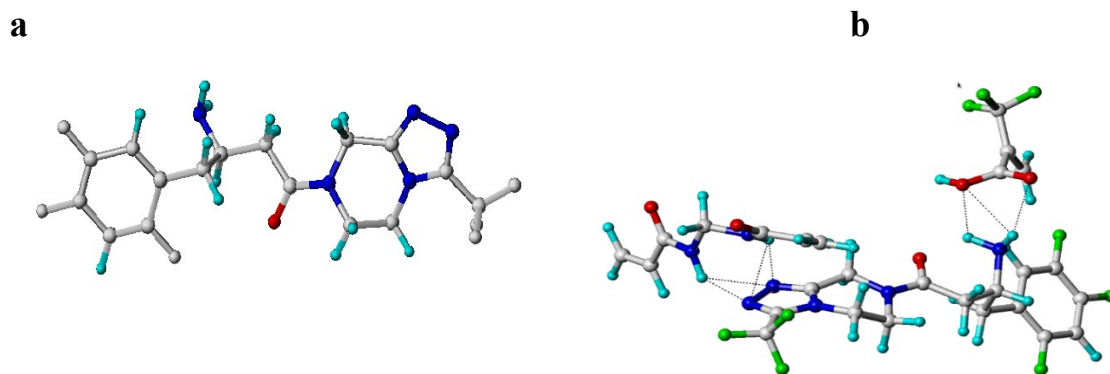

**Figure S2.** Minimized structure of (a) sitagliptin and (b) MBA-sitagliptin-TFMAA complex.

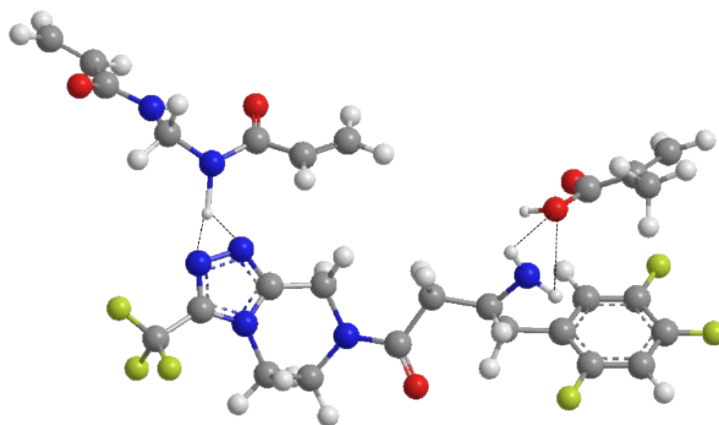

**Figure S3.** (a) Minimized structure of MBA-Sitagliptin-MAA complex

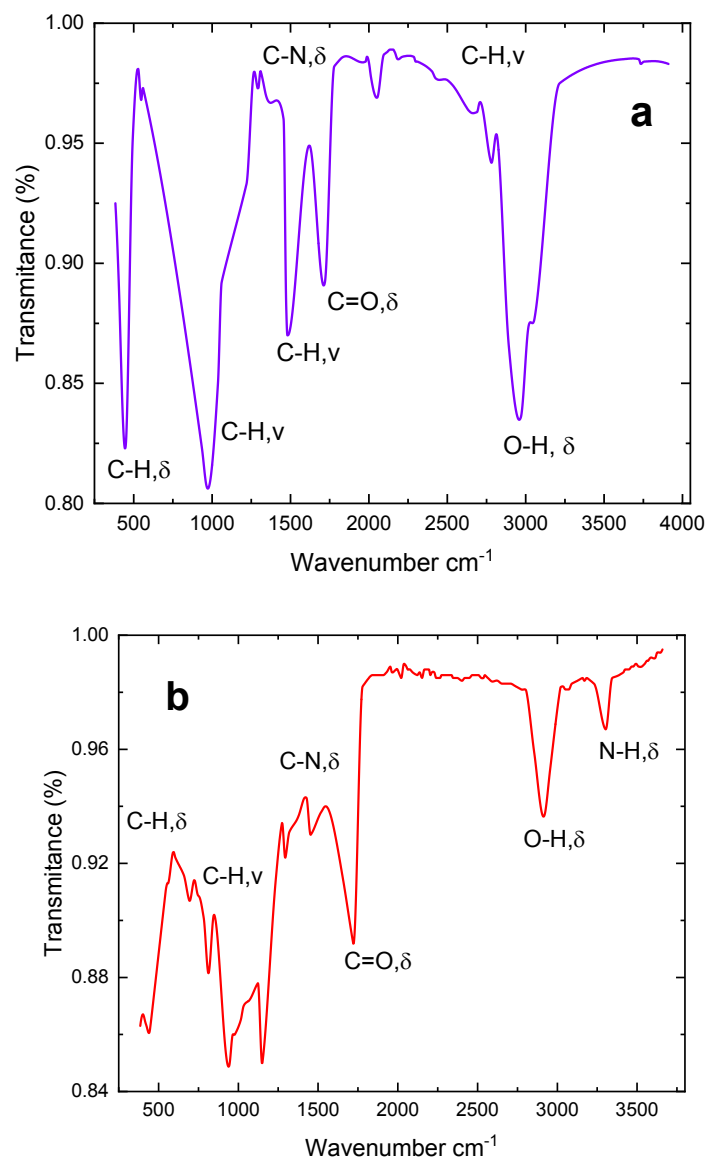

**Figure S4.** FTIR spectra of (a) nanoMIP 1 and (b) nanoMIP 2.

**Table S3.** The size measurements of nanopMIPs, (n=5)

| nanoMIP | DLS Analysis  |                            | TEM Analysis  |
|---------|---------------|----------------------------|---------------|
|         | Diameter (nm) | Polydispersity index (PDI) | Diameter (nm) |
| MIP-1   | 233 ± 5.8     | 0.32 ± 0.06                | 15 ± 4.5      |
| MIP-2   | 193 ± 9.5     | 0.36 ± 0.05                | 21 ± 3.2      |

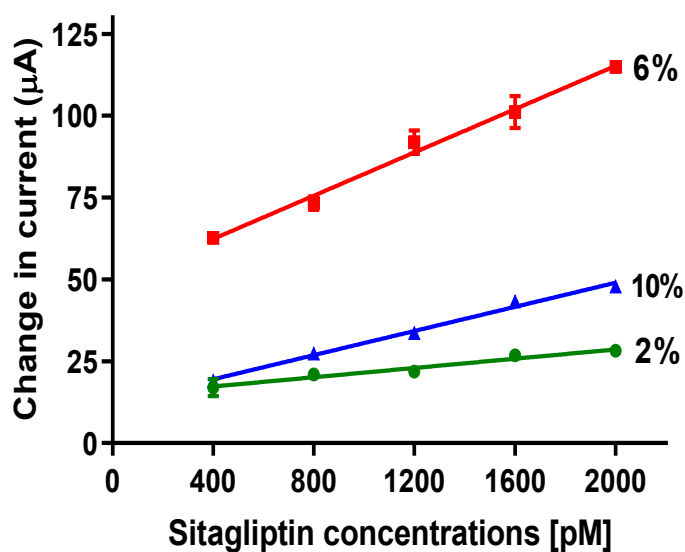

**Figure S5.** The effect of APTES concentration (2%, 6% and 10%) on SPPE. Experiments were performed in a concentration range from 400 to 2000 pM in PBS and measurement were repeated 3 times.

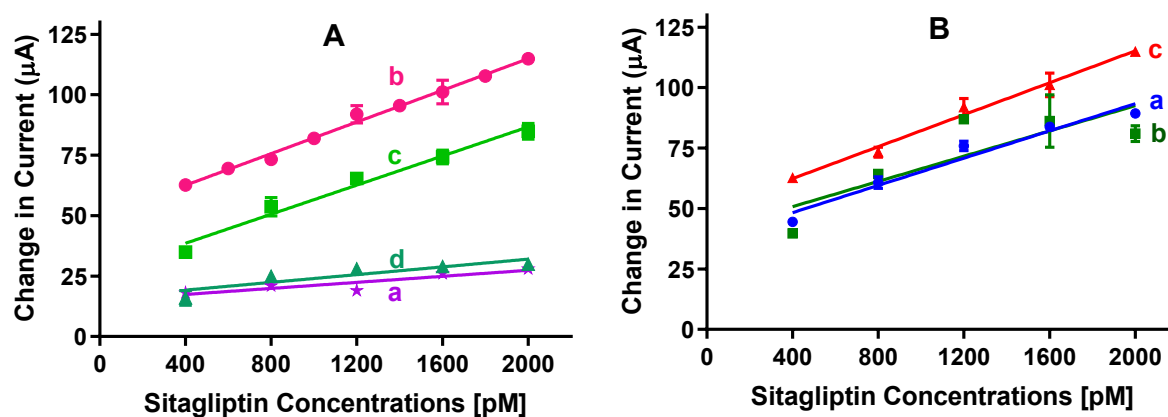

**Figure S6.** (A) The sensors response to Sitagliptin prepared with nanoMIP concentration at (a) 0.3, (b) 0.5, (c) 0.7 and (d) 1 mg mL<sup>-1</sup> on SPPE. (B) Sensor response to Sitagliptin prepared at different immobilization times of nanoMIP (a) 2, (b) 4 and (c) 20 h on SPPE. Experiments were performed in a concentration range from 400 to 2000 pM in PBS and measurement were repeated 3 times.

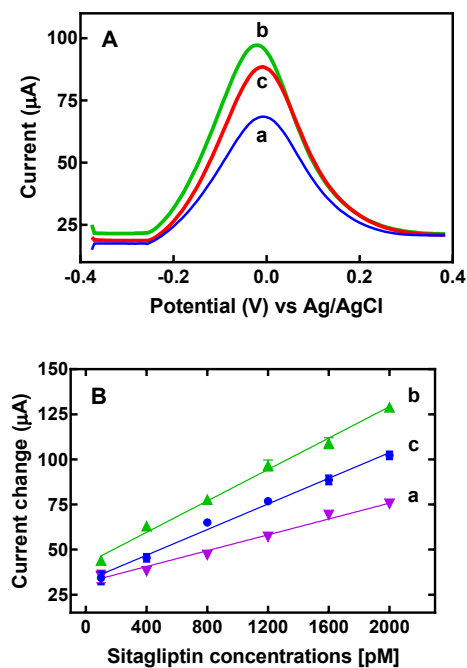

**Figure S7.** NanoMIP sensor response for different FcMMA monomer concentration at (a) 15, (b) 20, and (c) 25 molar %. Plot A, sensor response to 1200 pM of Sitagliptin in 5 mM PBS buffer and Plot B, calibration curve from 100 to 2000 pM Sitagliptin in 5 mM PBS buffer.

**Table S4.** Performance of the nanoMIP sensor

| <i>Parameter</i>                                      | <i>Level</i> | <i>Sensitivity<br/>(nA pM<sup>-1</sup>)</i> | <i>Linearity<br/>(R<sup>2</sup>)</i> |
|-------------------------------------------------------|--------------|---------------------------------------------|--------------------------------------|
| <i>nanoMIP<br/>Concentration (mg mL<sup>-1</sup>)</i> | 0.3          | 6.2                                         | 0.810                                |
|                                                       | <b>0.5</b>   | 32.7                                        | 0.993                                |
|                                                       | 0.7          | 30.0                                        | 0.977                                |
|                                                       | 1            | 8                                           | 0.793                                |
| <i>nanoMIP immobilization<br/>time (h)</i>            | 2            | 28.2                                        | 0.954                                |
|                                                       | 4            | 26.1                                        | 0.679                                |
|                                                       | <b>20</b>    | 33                                          | 0.991                                |
| <i>APTES Concentration (%)</i>                        | 2            | 7.1                                         | 0.960                                |
|                                                       | <b>6</b>     | 33                                          | 0.990                                |
|                                                       | 10           | 18.4                                        | 0.990                                |
| <i>FcMMA (molar %)</i>                                | 15           | 35.5                                        | 0.996                                |
|                                                       | <b>20</b>    | 43.5                                        | 0.998                                |
|                                                       | 25           | 22                                          | 0.989                                |

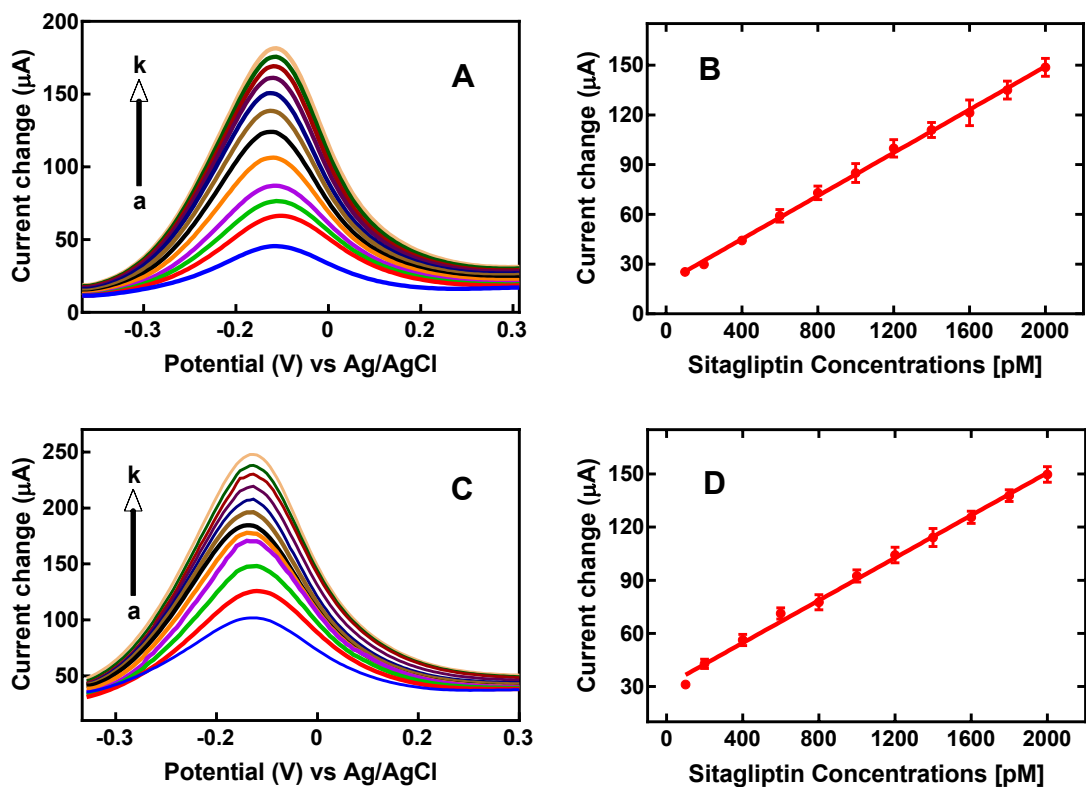

**Figure S8.** NanoMIP-1 sensor response (A), and the corresponding (B) calibration curve. NanoMIP-2 sensor response (C), and the resultant calibration curve (D). Experiments ( $n=3$ ) were performed in a sitagliptin concentration at (a) 0, (b) 100, (c) 400, (d) 600, (e) 800, and (f) 1000, (g) 1200, (h) 1400, (i) 1600, (j) 1800 and (k) 2000 pM in PBS.

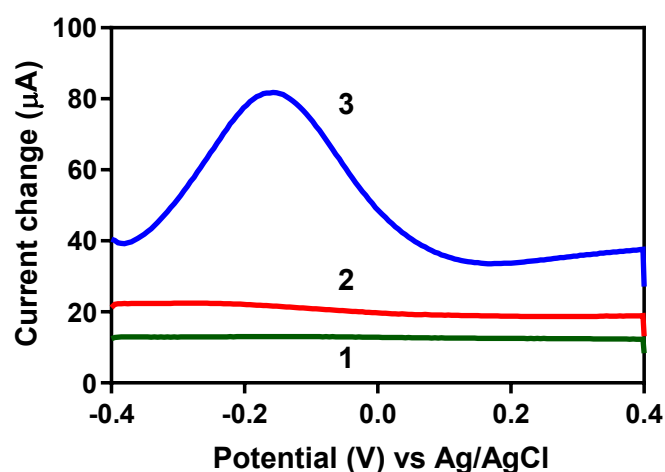

**Figure S9.** DPV response to (1) 5 mM PBS buffer and (2) 2.45 mM Sitagliptin on bare electrode, SPPE. (3) NanoMIP modified SPPE in 5 mM PBS buffer.

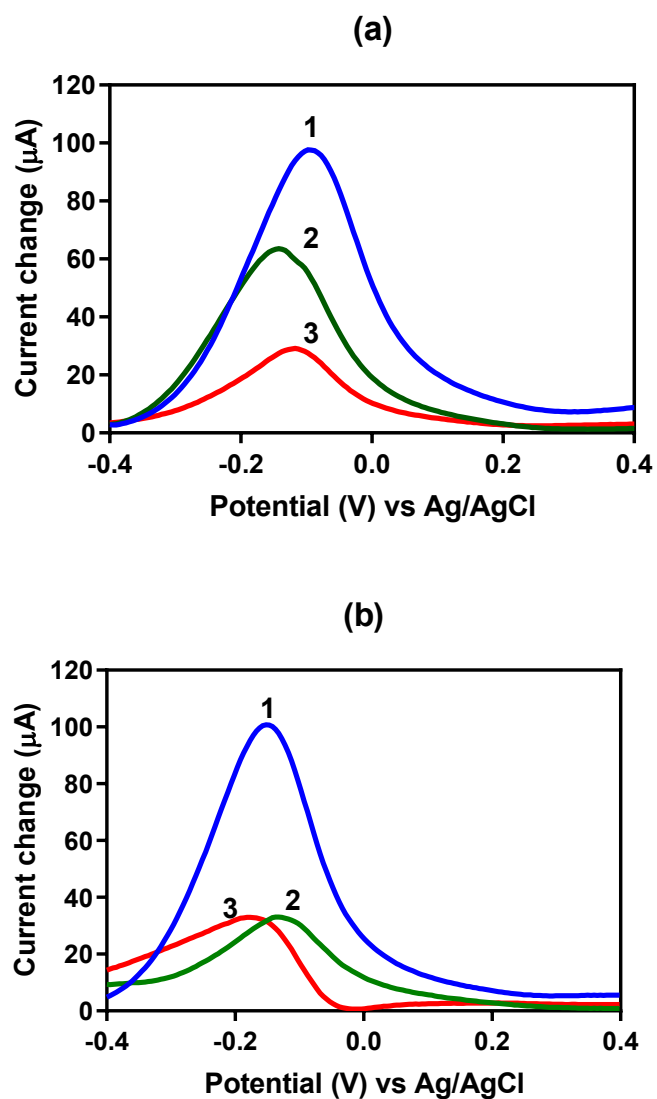

**Figure S10.** The DPV response recorded for (a) nanoMIP-1 and (b) nanoMIP-2 to (1) Sitagliptin, (2) Metformin, (3) Paracetamol. The drugs were tested at 1200pM in 5 mM PBS.



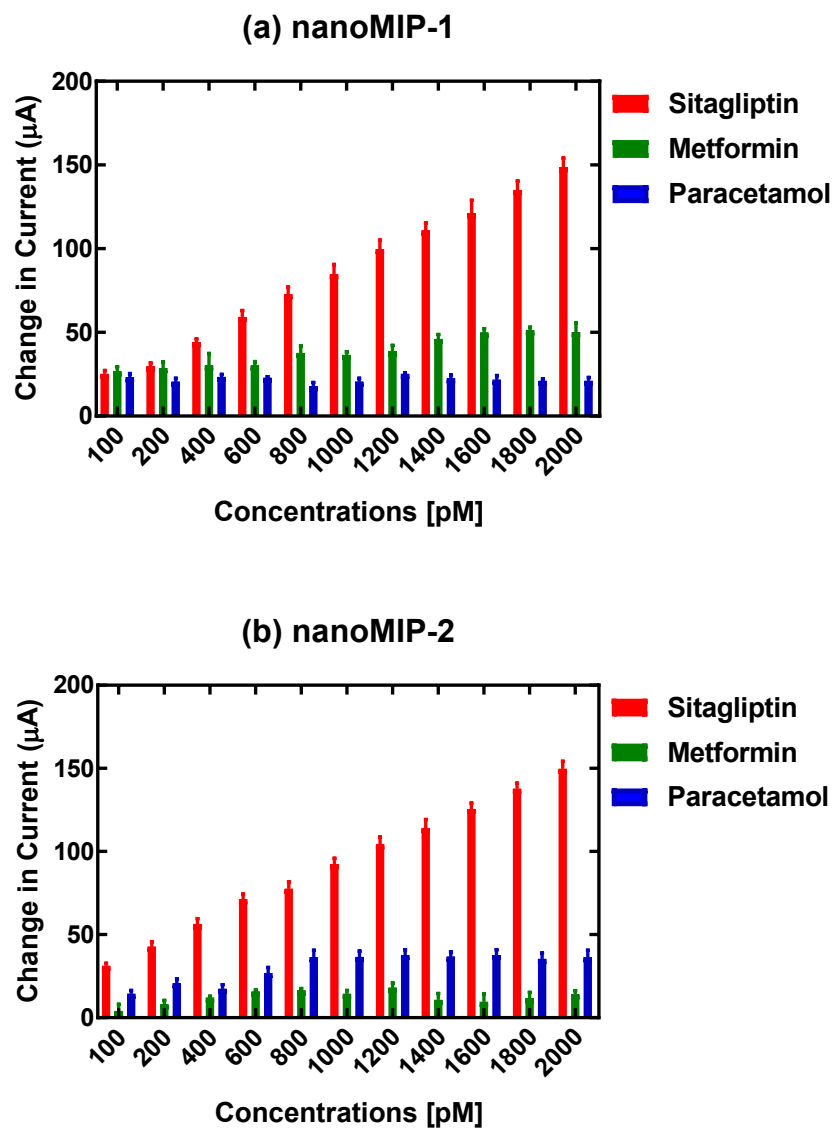

**Figure S11.** A comparison of the cross reactivity response between (a) nanoMIP-1 and (b) nanoMIP-2 towards metformin and paracetamol solutions under similar optimum conditions.

**Table S5.** Cross reactivity of fabricated nanoMIP sensors.

| Sensor response |                              | Sitagliptin | Metformin | Paracetamol |
|-----------------|------------------------------|-------------|-----------|-------------|
| nanoMIP-1       | Slope (nA pM <sup>-1</sup> ) | 65 ± 1      | 14 ± 1    | -0.3 ± 1    |
|                 | Linearity (R <sup>2</sup> )  | 0.998       | 0.857     | 0.011       |
|                 | Sensor response              | 100%        | 21.5%     | 0.5%        |
| nanoMIP-2       | Slope (nA pM <sup>-1</sup> ) | 60 ± 1      | 2.1 ± 2   | 11.5 ± 2    |
|                 | Linearity (R <sup>2</sup> )  | 0.996       | 0.117     | 0.687       |
|                 | Sensor response              | 100%        | 3.5%      | 19.2%       |

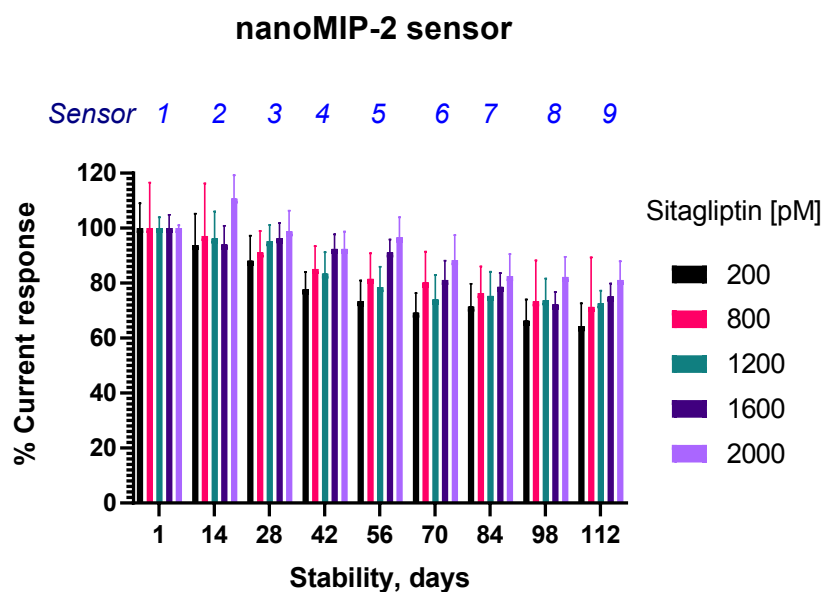

**Figure S12.** Percentage of the current response against days of storage of nanoMIP-2 sensor.
